# Supplementary material for: Managing low-level HIV viraemia in antiretroviral therapy: a systematic review and meta-analysis
Source: PubMed Central journal article supplement — Sex Transm Infect. 2024 Sep 17;100(7):e056198. doi: 10.1136/sextrans-2024-056198 (PMC11503136; doi:10.1136/sextrans-2024-056198), 2024-09-17
Supplement: sextrans-100-7-s001.pdf [file sextrans-100-7-s001.pdf]

Search was conducted on Jan, 29<sup>th</sup> 2024.

**Search line for MEDLINE: 615 records retrieved**

("low level viremia" OR "low-level viremia" OR "low viremia" OR "persistent viremia" OR "low-level HIV viremia" OR "non-suppressible viremia" OR "non suppressible viremia" OR "residual viremia" OR "low level viraemia" OR "low-level viraemia" OR "low viraemia" OR "persistent viraemia" OR "residual viraemia" OR "blip") AND ( "HIV"[Mesh] OR "Human Immunodeficiency Virus" OR PLWH OR "people living with hiv")

**Search line for EMBASE: 1288 records retrieved**

('low level viremia' OR 'low-level viremia' OR 'low viremia' OR 'persistent viremia' OR 'low-level hiv viremia' OR 'non-suppressible viremia' OR 'non suppressible viremia' OR 'residual viremia' OR 'low level viraemia' OR 'low-level viraemia' OR 'low viraemia' OR 'persistent viraemia' OR 'residual viraemia' OR 'blip') AND ('human immunodeficiency virus'/exp OR 'human immunodeficiency virus' OR 'plwh' OR 'people living with hiv')

**Search line for Cochrane Library: 228 records retrieved**

('low level viremia' OR 'low viremia' OR 'low viraemia' OR 'low-level viremia' OR 'low-level viraemia' OR 'persistent viremia' OR 'low-level hiv viremia' OR 'non-suppressible viremia' OR 'non suppressible viremia' OR 'residual viremia' OR 'persistent viraemia' OR 'non suppressible viraemia' OR 'non-suppressible viraemia' OR ' residual viraemia' OR 'blip') AND ('Human immunodeficiency virus' OR 'human immunodeficiency virus' OR 'plwh' OR 'people living with hiv') in Title Abstract Keyword - (Word variations have been searched)

**Search line for Web Of Science: 48 records retrieved**

TI=('low level viremia' OR 'low level viraemia' OR 'low-level viraemia' OR 'low-level viremia' OR 'low-level hiv viremia' OR 'low-level hiv viraemia' OR 'non-suppressible viremia' OR 'non-suppressible viraemia' OR 'non suppressible viraemia' OR 'non suppressible viremia' OR 'residual viremia' OR 'persistent viremia' OR 'persistent viraemia' OR 'residual viraemia' OR 'low viremia' OR 'low viraemia' OR 'blip') AND TI=('Human immunodeficiency virus' OR 'human immunodeficiency virus' OR 'PLWH' OR 'people living with hiv')

**Search line for Clinicaltrials.gov: 82 records retrieved**

Condition: HIV

Other terms: 'low level viremia' OR 'low-level viremia' OR 'persistent viremia' OR 'low-level hiv viremia' OR 'non-suppressible viremia' OR 'non suppressible viremia' OR 'residual viremia' OR 'blip'

**Search line for CADTH: 0 records retrieved.**

('low level viremia' OR 'low-level viremia' OR 'low-level hiv viremia' OR 'non-suppressible viremia' OR 'non suppressible viremia' OR 'residual viremia' OR 'persistent viremia' OR 'blip') AND ('Human immunodeficiency virus' OR 'human immunodeficiency virus' OR 'plwh' OR 'people living with hiv')
