# Supplementary material for: Managing low-level HIV viraemia in antiretroviral therapy: a systematic review and meta-analysis
Source: PubMed Central journal article supplement — Sex Transm Infect. 2024 Sep 17;100(7):e056198. doi: 10.1136/sextrans-2024-056198 (PMC11503136; doi:10.1136/sextrans-2024-056198), 2024-09-17
Supplement: sextrans-100-7-s002.pdf [file sextrans-100-7-s002.pdf]

| Randomized and Non-Randomized Interventional Studies |      |              |                              |          |     |          |          |          |          |     |
|------------------------------------------------------|------|--------------|------------------------------|----------|-----|----------|----------|----------|----------|-----|
| Authors                                              | Year | Study design | ROB 2/ROBINS-I overall score | D1       | D2  | D3       | D4       | D5       | D6       | D7  |
| Scutari et al.                                       | 2023 | RCT          | Low                          | L        | L   | L        | L        | L        | -        | -   |
| Brown et al.                                         | 2021 | RCT          | Low                          | L        | L   | L        | L        | L        | -        | -   |
| Amstutz et al.                                       | 2020 | RCT          | Low                          | L        | L   | L        | L        | L        | -        | -   |
| Nanyeenya et al.                                     | 2022 | RCT          | High                         | H        | SC  | L        | L        | L        | -        | -   |
| Gandhi et al.                                        | 2010 | RCT          | Low                          | L        | L   | L        | L        | L        | -        | -   |
| McMahon et al.                                       | 2010 | NRIS         | Moderate                     | Serious  | Low | Moderate | Low      | Low      | Moderate | Low |
| Campillo-Gimenez et al.                              | 2015 | NRIS         | Serious                      | Serious  | Low | Serious  | Moderate | Moderate | Moderate | Low |
| Dinoso et al.                                        | 2009 | NRIS         | Moderate                     | Moderate | Low | Moderate | Low      | Moderate | Moderate | Low |
| De Miguel Buckley et al.                             | 2022 | NRIS         | Low                          | Low      | Low | Moderate | Low      | Moderate | Moderate | Low |

| Observational Studies: Cohort |      |                      |     |           |               |         |
|-------------------------------|------|----------------------|-----|-----------|---------------|---------|
| Authors                       | Year | Study design         | NOS | Selection | Comparability | Outcome |
| Palich et al.                 | 2020 | Cohort               | 8   | 4         | 1             | 3       |
| Gonzalez-Sema et al.          | 2016 | Cohort               | 7   | 3         | 1             | 3       |
| Boillat-Blanco et al.         | 2015 | Retrospective Cohort | 8   | 4         | 2             | 2       |
| Taiwo et al.                  | 2011 | Cohort               | 8   | 4         | 2             | 2       |
| Ferretti et al.               | 2019 | Cohort               | 7   | 4         | 2             | 1       |
| Vancoillie et al.             | 2015 | Cohort               | 6   | 3         | 1             | 2       |
| Lan et al.                    | 2023 | Cohort               | 7   | 4         | 1             | 2       |
| Gallien et al.                | 2011 | Cohort               | 8   | 4         | 2             | 2       |
| Bangalee et al.               | 2021 | Rtrospective Cohort  | 6   | 4         | 1             | 1       |
| Nettles et al.                | 2004 | Cohort               | 6   | 4         | 1             | 1       |
| Zaccarelli et al.             | 2016 | Cohort               | 6   | 4         | 1             | 1       |
| Swenson et al.                | 2014 | Cohort               | 9   | 4         | 2             | 3       |
| Bareng et al.                 | 2022 | Cohort               | 8   | 4         | 1             | 3       |
| Taramasso et al.              | 2020 | Cohort               | 8   | 4         | 1             | 3       |
| Liu et al.                    | 2022 | Cohort               | 8   | 3         | 2             | 3       |
| Delaugerre et al.             | 2012 | Cohort               | 6   | 3         | 0             | 3       |
| Vancoillie et al.             | 2017 | Cohort               | 6   | 3         | 0             | 3       |
| Parra-Ruiz et al.             | 2009 | Cohort               | 6   | 4         | 1             | 1       |
| Nzivo et al.                  | 2023 | Retrospective Cohort | 6   | 4         | 1             | 1       |
| McConnell et al.              | 2011 | Cohort               | 8   | 4         | 2             | 2       |
| Maggiolo et al.               | 2022 | trial                | 6   | 3         | 1             | 2       |
| Maggiolo et al.               | 2017 | Cohort               | 9   | 4         | 2             | 3       |
| Eastbum et al.                | 2011 | Cohort               | 7   | 2         | 2             | 3       |
| Bull et al.                   | 2018 | Cohort               | 6   | 3         | 0             | 3       |
| Wirden et al.                 | 2015 | Retrospective cohort | 8   | 4         | 2             | 2       |

| Observational Studies: Cohort |      |              |   |   |   |   |
|-------------------------------|------|--------------|---|---|---|---|
| Pham et al.                   | 2011 | Case-Control | 6 | 4 | 1 | 1 |
| Botha-Le Roux et al.          | 2022 | Case-Control | 9 | 4 | 2 | 3 |
| Elvstam et al.                | 2019 | Case-Control | 8 | 3 | 2 | 3 |
| Miller et al.                 | 2004 | Case-Control | 9 | 4 | 2 | 3 |
| Bouchard et al.               | 2022 | Case-Control | 9 | 4 | 2 | 3 |
| Goupil de Bouillé et al.      | 2021 | Case-Control | 9 | 4 | 2 | 3 |
| Konstantopoulos et al.        | 2015 | Case-Control | 7 | 4 | 1 | 2 |

| Observational Studies: Cross-sectional |      |                 |   |   |   |   |
|----------------------------------------|------|-----------------|---|---|---|---|
| Reus et al.                            | 2013 | Cross sectional | 8 | 3 | 2 | 3 |
| Chun et al.                            | 2011 | Cross sectional | 9 | 4 | 2 | 3 |
| Gandhi et al.                          | 2013 | Cross sectional | 8 | 3 | 2 | 3 |
| Gonzalez-Sema et al.                   | 2014 | Cross sectional | 9 | 4 | 2 | 3 |
| Li et al.                              | 2012 | Cross sectional | 8 | 4 | 1 | 3 |
| Kao et al.                             | 2021 | Cross sectional | 7 | 3 | 1 | 3 |
| Sanforo et al.                         | 2014 | Cross sectional | 6 | 3 | 0 | 3 |
