# Supplementary material for: Managing low-level HIV viraemia in antiretroviral therapy: a systematic review and meta-analysis
Source: PubMed Central journal article supplement — Sex Transm Infect. 2024 Sep 17;100(7):e056198. doi: 10.1136/sextrans-2024-056198 (PMC11503136; doi:10.1136/sextrans-2024-056198), 2024-09-17
Supplement: sextrans-100-7-s003.pdf [file sextrans-100-7-s003.pdf]

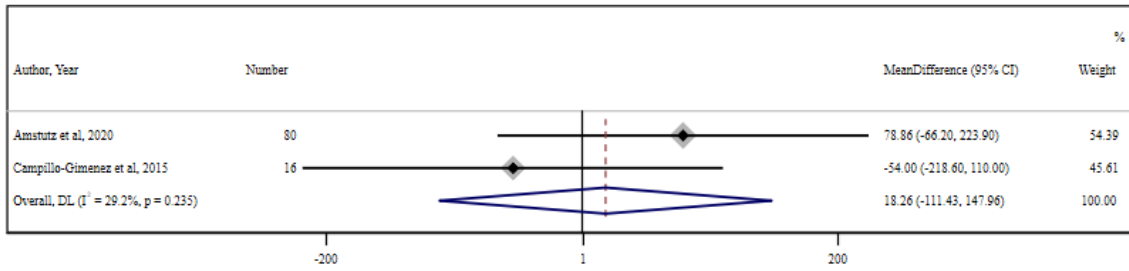

**Supplementary material 3.** Metanalysis of 2 studies reporting the impact of therapeutic switch on CD4 levels
