# Supplementary material for: Managing low-level HIV viraemia in antiretroviral therapy: a systematic review and meta-analysis
Source: PubMed Central journal article supplement — Sex Transm Infect. 2024 Sep 17;100(7):e056198. doi: 10.1136/sextrans-2024-056198 (PMC11503136; doi:10.1136/sextrans-2024-056198), 2024-09-17
Supplement: sextrans-100-7-s004.pdf [file sextrans-100-7-s004.pdf]

**Author(s):**  
**Question:** Therapeutic switch compared to no switch in PLWH with viremia of low magnitude  
**Setting:**  
**Bibliography:**

| Certainty assessment                                           |                        |                      |                      |              |                      |                      | N <sub>e</sub> of patients       |                 | Effect                            |                                                           | Certainty        | Importance |
|----------------------------------------------------------------|------------------------|----------------------|----------------------|--------------|----------------------|----------------------|----------------------------------|-----------------|-----------------------------------|-----------------------------------------------------------|------------------|------------|
| N <sub>e</sub> of studies                                      | Study design           | Risk of bias         | Inconsistency        | Indirectness | Imprecision          | Other considerations | therapeutic switch               | no switch       | Relative (95% CI)                 | Absolute (95% CI)                                         |                  |            |
| <b>Number of PLWH with virologic suppression (&lt;20cp/ml)</b> |                        |                      |                      |              |                      |                      |                                  |                 |                                   |                                                           |                  |            |
| 4                                                              | non-randomised studies | serious <sup>a</sup> | serious <sup>b</sup> | not serious  | serious <sup>c</sup> | none                 | 258/435 (59.3%)                  | 306/532 (57.5%) | <b>OR 3.43</b><br>(0.50 to 23.68) | <b>248 more per 1,000</b><br>(from 171 fewer to 395 more) | ⊕○○○<br>Very low | CRITICAL   |
| <b>Number of PWH with virologic suppression (&lt;50cp/ml)</b>  |                        |                      |                      |              |                      |                      |                                  |                 |                                   |                                                           |                  |            |
| 2                                                              | non-randomised studies | serious <sup>a</sup> | serious <sup>b</sup> | not serious  | serious <sup>c</sup> | none                 | 66/121 (54.5%)                   | 83/192 (43.2%)  | <b>OR 1.57</b><br>(0.97 to 2.55)  | <b>112 more per 1,000</b><br>(from 7 fewer to 228 more)   | ⊕○○○<br>Very low | CRITICAL   |
| <b>Number of PWH with virologic suppression (&lt;50cp/ml)</b>  |                        |                      |                      |              |                      |                      |                                  |                 |                                   |                                                           |                  |            |
| 1                                                              | randomised trials      | not serious          | serious <sup>b</sup> | not serious  | serious <sup>d</sup> | none                 | 22/40 (55.0%)                    | 0.0%            | <b>OR 3.60</b><br>(1.22 to 10.65) | <b>0 fewer per 1,000</b><br>(from 0 fewer to 0 fewer)     | ⊕⊕○○<br>Low      | CRITICAL   |
| <b>Mean Difference of CD4 (pre-post therapeutic switch)</b>    |                        |                      |                      |              |                      |                      |                                  |                 |                                   |                                                           |                  |            |
| 1                                                              | non-randomised studies | serious <sup>e</sup> | serious <sup>f</sup> | not serious  | serious <sup>d</sup> | none                 | Mean difference -54 (-218-110)   |                 |                                   | ⊕○○○<br>Very low                                          | IMPORTANT        |            |
| <b>Mean Difference of CD4 (pre-post therapeutic switch)</b>    |                        |                      |                      |              |                      |                      |                                  |                 |                                   |                                                           |                  |            |
| 1                                                              | randomised trials      | not serious          | serious <sup>f</sup> | not serious  | serious <sup>d</sup> | none                 | Mean Difference 78.8 (-66.2-223) |                 |                                   | ⊕⊕○○<br>Low                                               | IMPORTANT        |            |

CI: confidence interval; OR: odds ratio

**Explanations**

- a. Some issues regarding comparability and adequacy of follow up of cohorts.
- b. There is important heterogeneity between studies, which report very wide confidence interval. Furthermore, they report inconsistent effect of therapeutic switch on virologic suppression.
- c. Wide confidence intervals, small sample sizes, small effect
- d. Wide confidence interval
- e. Risk of bias due to confounding, measurement of outcome and missing data
- f. Important heterogeneity among studies. Inconsistent effect of therapeutic switch on CD4 levels
