# Supplementary material for: Managing low-level HIV viraemia in antiretroviral therapy: a systematic review and meta-analysis
Source: PubMed Central journal article supplement — Sex Transm Infect. 2024 Sep 17;100(7):e056198. doi: 10.1136/sextrans-2024-056198 (PMC11503136; doi:10.1136/sextrans-2024-056198), 2024-09-17
Supplement: sextrans-100-7-s005.pdf [file sextrans-100-7-s005.pdf]

**Author(s):**  
**Question:** Genotype resistance testing compared to no such intervention in PLWH with viremia of low magnitude  
**Setting:**  
**Bibliography:**

| Certainty assessment                             |                        |                      |                      |                      |                      |                      | N <sub>e</sub> of patients                                                               |                      | Effect            |                   | Certainty | Importance |
|--------------------------------------------------|------------------------|----------------------|----------------------|----------------------|----------------------|----------------------|------------------------------------------------------------------------------------------|----------------------|-------------------|-------------------|-----------|------------|
| N <sub>e</sub> of studies                        | Study design           | Risk of bias         | Inconsistency        | Indirectness         | Imprecision          | Other considerations | genotype resistance testing                                                              | no such intervention | Relative (95% CI) | Absolute (95% CI) |           |            |
| <b>Proportion of resistance evaluated by GRT</b> |                        |                      |                      |                      |                      |                      |                                                                                          |                      |                   |                   |           |            |
| 19                                               | non-randomised studies | serious <sup>a</sup> | serious <sup>b</sup> | serious <sup>c</sup> | serious <sup>d</sup> | none                 | Overall proportion of resistance in PLWH with LLV 28.7 (27.4-29.6)                       |                      | ⊕○○○<br>Very low  |                   | IMPORTANT |            |
| <b>Number of PLWH with virologic suppression</b> |                        |                      |                      |                      |                      |                      |                                                                                          |                      |                   |                   |           |            |
| 3                                                | non-randomised studies | not serious          | not serious          | serious <sup>c</sup> | serious <sup>d</sup> | none                 | PLWH with RAM in GRT achieve less frequently viral suppression OR 0.29 (95%CI 0.14-0.58) |                      | ⊕○○○<br>Very low  |                   | IMPORTANT |            |

CI: confidence interval

**Explanations**

- a. Some issues regarding comparability and adequacy of follow up of cohorts
- b. Studies reporting a wide range of proportion of resistances evaluated by GRT
- c. Outcome does not answer directly the study question
- d. Wide confidence intervals
