# Supplementary material for: Managing low-level HIV viraemia in antiretroviral therapy: a systematic review and meta-analysis
Source: PubMed Central journal article supplement — Sex Transm Infect. 2024 Sep 17;100(7):e056198. doi: 10.1136/sextrans-2024-056198 (PMC11503136; doi:10.1136/sextrans-2024-056198), 2024-09-17
Supplement: sextrans-100-7-s006.pdf [file sextrans-100-7-s006.pdf]

**Author(s):**  
**Question:** Controlling adherence compared to no such intervention for managing PLWH with LLV  
**Setting:**  
**Bibliography:**

| Certainty assessment                                       |                        |              |               |                      |                      |                      | Impact                                                                       | Certainty        | Importance |
|------------------------------------------------------------|------------------------|--------------|---------------|----------------------|----------------------|----------------------|------------------------------------------------------------------------------|------------------|------------|
| N <sub>s</sub> of studies                                  | Study design           | Risk of bias | Inconsistency | Indirectness         | Imprecision          | Other considerations |                                                                              |                  |            |
| <b>Percentage of suboptimal adherence in PLWH with LMV</b> |                        |              |               |                      |                      |                      |                                                                              |                  |            |
| 5                                                          | non-randomised studies | not serious  | not serious   | serious <sup>a</sup> | serious <sup>b</sup> | none                 | Percentage of suboptimal adherence in PLWH with LMV 38.05% (95%CI 32.7-43.3) | ⊕○○○<br>Very low | IMPORTANT  |

CI: confidence interval

**Explanations**

- a. Does not answer directly the study question
- b. Wide confidence intervals
